# Supplementary material for: Suitable Areas for Apiculture Expansion Determined by Antioxidant Power, Chemical Profiles, and Pesticide Residues in Caldcluvia paniculata Honey and Beeswax Samples
Source: MDPI journal article supplement (doi:10.3390/insects13010031), 2021-12-28
Supplement: s1 [file s1]

| Supporting Table S1. List of pesticides analyzed in honey and beeswax samples |                               |       |      |                   |          |                       |       |
|-------------------------------------------------------------------------------|-------------------------------|-------|------|-------------------|----------|-----------------------|-------|
| N°                                                                            | Pesticide                     | DL    | QL   | Extraction method |          | Chromatography method |       |
|                                                                               |                               |       |      | SPE               | QuEChERS | LC-MS/MS              | GC-MS |
| 1                                                                             | 2,4 D                         | 0,05  | 0,1  | ✓                 |          | ✓                     |       |
| 2                                                                             | ABAMECTIN                     | 0,005 | 0,01 | ✓                 |          | ✓                     |       |
| 3                                                                             | ACEPHATE                      | 0,005 | 0,01 | ✓                 |          | ✓                     |       |
| 4                                                                             | ACEQUINOCYL                   | 0,005 | 0,01 | ✓                 |          | ✓                     |       |
| 5                                                                             | ACETAMIPRID                   | 0,005 | 0,01 | ✓                 |          | ✓                     |       |
| 6                                                                             | ACETOCHLOR                    | 0,005 | 0,01 |                   | ✓        |                       | ✓     |
| 7                                                                             | ACRINATHRIN                   | 0,005 | 0,01 |                   | ✓        |                       | ✓     |
| 8                                                                             | ALACHLOR                      | 0,005 | 0,01 |                   | ✓        |                       | ✓     |
| 9                                                                             | ALDICARB                      | 0,005 | 0,01 | ✓                 |          | ✓                     |       |
| 10                                                                            | ALDICARB SULFONE              | 0,005 | 0,01 | ✓                 |          | ✓                     |       |
| 11                                                                            | ALDICARB SULFOXIDO            | 0,005 | 0,01 | ✓                 |          | ✓                     |       |
| 12                                                                            | ALDRIN                        | 0,005 | 0,01 |                   | ✓        |                       | ✓     |
| 13                                                                            | ATRAZINE                      | 0,005 | 0,01 |                   | ✓        |                       | ✓     |
| 14                                                                            | AZADIRACTIN                   | 0,005 | 0,01 | ✓                 |          | ✓                     |       |
| 15                                                                            | AZINPHOS ETHYL                | 0,005 | 0,01 |                   | ✓        |                       | ✓     |
| 16                                                                            | AZINPHOS METHYL               | 0,005 | 0,01 |                   | ✓        |                       | ✓     |
| 17                                                                            | AZOXYSTROBIN                  | 0,05  | 0,1  | ✓                 |          | ✓                     |       |
| 18                                                                            | BAC C10 BENZALKONIUM CHLORIDE | 0,005 | 0,01 | ✓                 |          | ✓                     |       |
| 19                                                                            | BAC C12 BENZALKONIUM CHLORIDE | 0,005 | 0,01 | ✓                 |          | ✓                     |       |
| 20                                                                            | BAC C14 BENZALKONIUM CHLORIDE | 0,005 | 0,01 | ✓                 |          | ✓                     |       |
| 21                                                                            | BENALAXYL                     | 0,005 | 0,01 | ✓                 |          | ✓                     |       |
| 22                                                                            | BENOMYL/CARBENDAZIM           | 0,005 | 0,01 | ✓                 |          | ✓                     |       |
| 23                                                                            | BENTAZON                      | 0,005 | 0,01 | ✓                 |          | ✓                     |       |
| 24                                                                            | BHC ALPHA                     | 0,005 | 0,01 |                   | ✓        |                       | ✓     |
| 25                                                                            | BHC BETA                      | 0,005 | 0,01 |                   | ✓        |                       | ✓     |
| 26                                                                            | BHC DELTA                     | 0,005 | 0,01 |                   | ✓        |                       | ✓     |
| 27                                                                            | BIFENAZATE                    | 0,005 | 0,01 |                   | ✓        |                       | ✓     |
| 28                                                                            | BIFENTHRIN                    | 0,005 | 0,01 |                   | ✓        |                       | ✓     |
| 29                                                                            | BITERTANOL                    | 0,005 | 0,01 |                   | ✓        |                       | ✓     |
| 30                                                                            | BOSCALID                      | 0,005 | 0,01 | ✓                 |          | ✓                     |       |
| 31                                                                            | BRODIFACUUM                   | 0,005 | 0,01 | ✓                 |          | ✓                     |       |
| 32                                                                            | BROMACIL                      | 0,005 | 0,01 | ✓                 |          | ✓                     |       |
| 33                                                                            | BROMADIOLONE                  | 0,005 | 0,01 |                   | ✓        |                       | ✓     |
| 34                                                                            | BROMOPHOS ETHYL               | 0,005 | 0,01 |                   | ✓        |                       | ✓     |
| 35                                                                            | BROMOPHOS METHYL              | 0,005 | 0,01 |                   | ✓        |                       | ✓     |
| 36                                                                            | BROMOPROPYLATE                | 0,005 | 0,01 |                   | ✓        |                       | ✓     |
| 37                                                                            | BUPROFEZIN                    | 0,005 | 0,01 |                   | ✓        |                       | ✓     |
| 38                                                                            | CADUSAFOS                     | 0,005 | 0,01 |                   | ✓        |                       | ✓     |
| 39                                                                            | CAPTAFOF                      | 0,005 | 0,01 |                   | ✓        |                       | ✓     |
| 40                                                                            | CAPTAN                        | 0,005 | 0,01 |                   | ✓        |                       | ✓     |
| 41                                                                            | CARBARYL                      | 0,005 | 0,01 | ✓                 |          | ✓                     |       |
| 42                                                                            | CARBOFURAN                    | 0,005 | 0,01 | ✓                 |          | ✓                     |       |
| 43                                                                            | CARBOPHENOTHION               | 0,005 | 0,01 |                   | ✓        |                       | ✓     |
| 44                                                                            | CARTAP HCL                    | 0,005 | 0,01 | ✓                 |          | ✓                     |       |
| 45                                                                            | CHLOFENTEZINE                 | 0,005 | 0,01 | ✓                 |          | ✓                     |       |
| 46                                                                            | CHLORANTRANILIPROLE           | 0,005 | 0,01 | ✓                 |          | ✓                     |       |
| 47                                                                            | CHLORDANE CIS                 | 0,005 | 0,01 |                   | ✓        |                       | ✓     |

|    |                                     |       |      |   |   |   |   |
|----|-------------------------------------|-------|------|---|---|---|---|
| 48 | CHLORDANE TRANS                     | 0,005 | 0,01 |   | ✓ |   | ✓ |
| 49 | CHLORDENE                           | 0,005 | 0,01 |   | ✓ |   | ✓ |
| 50 | CHLORFENAPYR                        | 0,005 | 0,01 |   | ✓ |   | ✓ |
| 51 | CHLORFENSON                         | 0,005 | 0,01 |   | ✓ |   | ✓ |
| 52 | CHLORFENVINPHOS                     | 0,005 | 0,01 |   | ✓ |   | ✓ |
| 53 | CHLOROBENZILATE                     | 0,005 | 0,01 |   | ✓ |   | ✓ |
| 54 | CHLOROTHALONIL                      | 0,005 | 0,01 |   | ✓ |   | ✓ |
| 55 | CHLORPYRIFOS ETHYL                  | 0,005 | 0,01 |   | ✓ |   | ✓ |
| 56 | CHLORPYRIFOS METHYL                 | 0,005 | 0,01 |   | ✓ |   | ✓ |
| 57 | CYHEXATIN/AZOCICLOTIN               | 0,005 | 0,01 | ✓ |   | ✓ |   |
| 58 | CLETODIM (EYZ)                      | 0,005 | 0,01 |   | ✓ |   | ✓ |
| 59 | CLOTHIANIDIN                        | 0,005 | 0,01 | ✓ |   | ✓ |   |
| 60 | CYANAZINE                           | 0,005 | 0,01 |   | ✓ |   | ✓ |
| 61 | CYFLUTHRIN (**)                     | 0,005 | 0,01 |   | ✓ |   | ✓ |
| 62 | CYFLUTHRIN BETA                     | 0,005 | 0,01 |   | ✓ |   | ✓ |
| 63 | CYHALOTHRIN GAMMA                   | 0,005 | 0,01 |   | ✓ |   | ✓ |
| 64 | CYHALOTHRIN L                       | 0,005 | 0,01 |   | ✓ |   | ✓ |
| 65 | CYPERMETHRIN                        | 0,005 | 0,01 |   | ✓ |   | ✓ |
| 66 | CYPROCONAZOLE                       | 0,005 | 0,01 | ✓ |   | ✓ |   |
| 67 | CYPRODINIL                          | 0,005 | 0,01 | ✓ |   | ✓ |   |
| 68 | CYROMAZINE                          | 0,005 | 0,01 | ✓ |   | ✓ |   |
|    | DDAC                                |       |      |   |   |   |   |
| 69 | DIDECYLDIMETHYLAMMONIUM<br>CHLORIDE | 0,005 | 0,01 | ✓ |   | ✓ |   |
| 70 | DDD op                              | 0,005 | 0,01 |   | ✓ |   | ✓ |
| 71 | DDD pp                              | 0,005 | 0,01 |   | ✓ |   | ✓ |
| 72 | DDE op                              | 0,005 | 0,01 |   | ✓ |   | ✓ |
| 73 | DDE pp                              | 0,005 | 0,01 |   | ✓ |   | ✓ |
| 74 | DDT op                              | 0,005 | 0,01 |   | ✓ |   | ✓ |
| 75 | DDT pp                              | 0,005 | 0,01 |   | ✓ |   | ✓ |
| 76 | DELTAMETHRIN                        | 0,005 | 0,01 |   | ✓ |   | ✓ |
| 77 | DEMETON-S                           | 0,005 | 0,01 |   | ✓ |   | ✓ |
| 78 | DIAZINON                            | 0,005 | 0,01 |   | ✓ |   | ✓ |
| 79 | DICHOLOBENIL                        | 0,005 | 0,01 |   | ✓ |   | ✓ |
| 80 | DICHOFLUANID                        | 0,005 | 0,01 |   | ✓ |   | ✓ |
| 81 | DICHLORVOS                          | 0,005 | 0,01 |   | ✓ |   | ✓ |
| 82 | DICLORAN                            | 0,005 | 0,01 |   | ✓ |   | ✓ |
| 83 | DICOFOL op (**)                     | 0,005 | 0,01 |   | ✓ |   | ✓ |
| 84 | DICROTOPHOS (**)                    | 0,005 | 0,01 |   | ✓ |   | ✓ |
| 85 | DIELDRIN                            | 0,005 | 0,01 |   | ✓ |   | ✓ |
| 86 | DIFENOCONAZOLE                      | 0,005 | 0,01 | ✓ |   | ✓ |   |
| 87 | DIFLUBENZURON                       | 0,005 | 0,01 | ✓ |   | ✓ |   |
| 88 | DIMETHENAMID                        | 0,005 | 0,01 |   | ✓ |   | ✓ |
| 89 | DIMETHOATE                          | 0,005 | 0,01 | ✓ |   | ✓ |   |
| 90 | DIMETHOMORF                         | 0,005 | 0,01 | ✓ |   | ✓ |   |
| 91 | DIPHENYLAMINE                       | 0,005 | 0,01 |   | ✓ |   | ✓ |
| 92 | DISULFOTON                          | 0,005 | 0,01 |   | ✓ |   | ✓ |
| 93 | DODINE                              | 0,005 | 0,01 | ✓ |   | ✓ |   |
| 94 | EMAMECTIN BENZOATE                  | 0,005 | 0,01 | ✓ |   | ✓ |   |
| 95 | ENDOSULFAN I                        | 0,005 | 0,01 |   | ✓ |   | ✓ |
| 96 | ENDOSULFAN II                       | 0,005 | 0,01 |   | ✓ |   | ✓ |
| 97 | ENDOSULFAN SULFATE                  | 0,005 | 0,01 |   | ✓ |   | ✓ |
| 98 | ENDRIN                              | 0,005 | 0,01 |   | ✓ |   | ✓ |
| 99 | EPTC                                | 0,005 | 0,01 |   | ✓ |   | ✓ |

|     |                           |       |      |   |   |   |   |
|-----|---------------------------|-------|------|---|---|---|---|
| 100 | ESFENVALERATE/FENVALERATE | 0,005 | 0,01 | ✓ |   | ✓ |   |
| 101 | ETHION                    | 0,005 | 0,01 |   | ✓ |   | ✓ |
| 102 | ETHOPROFOS                | 0,005 | 0,01 | ✓ |   | ✓ |   |
| 103 | ETOFENPROX                | 0,005 | 0,01 | ✓ |   | ✓ |   |
| 104 | FENAMIPHOS                | 0,005 | 0,01 |   | ✓ |   | ✓ |
| 105 | FENARIMOL                 | 0,005 | 0,01 |   | ✓ |   | ✓ |
| 106 | FENAZAQUIN                | 0,005 | 0,01 | ✓ |   | ✓ |   |
| 107 | FENBUCONAZOLE             | 0,005 | 0,01 |   | ✓ |   | ✓ |
| 108 | FENCLOPHOS                | 0,005 | 0,01 |   | ✓ |   | ✓ |
| 109 | FENHEXAMID                | 0,005 | 0,01 |   | ✓ |   | ✓ |
| 110 | FENITROTHION              | 0,005 | 0,01 |   | ✓ |   | ✓ |
| 111 | FENOXYCARB                | 0,005 | 0,01 | ✓ |   | ✓ |   |
| 112 | FENPROPATHRIN             | 0,005 | 0,01 |   | ✓ |   | ✓ |
| 113 | FENPROPIMORF              | 0,005 | 0,01 | ✓ |   | ✓ |   |
| 114 | FENPYROXIMATE             | 0,005 | 0,01 | ✓ |   | ✓ |   |
| 115 | FENTHION                  | 0,005 | 0,01 |   | ✓ |   | ✓ |
| 116 | FERBAM                    | 0,005 | 0,01 |   | ✓ |   | ✓ |
| 117 | FIPRONIL                  | 0,005 | 0,01 |   | ✓ |   | ✓ |
| 118 | FLOCUMAFEN                | 0,005 | 0,01 | ✓ |   | ✓ |   |
| 119 | FLUAZINAM                 | 0,005 | 0,01 | ✓ |   | ✓ |   |
| 120 | FLUDIOXINIL               | 0,005 | 0,01 | ✓ |   | ✓ |   |
| 121 | FLUFENOXURON (**)         | 0,005 | 0,01 | ✓ |   | ✓ |   |
| 122 | FLUMETRALIN               | 0,005 | 0,01 |   | ✓ |   | ✓ |
| 123 | FLUQUINCONAZOLE           | 0,005 | 0,01 |   | ✓ |   | ✓ |
| 124 | FLUSILAZOLE               | 0,005 | 0,01 |   | ✓ |   | ✓ |
| 125 | FLUTRIAFOL (**)           | 0,005 | 0,01 |   | ✓ |   | ✓ |
| 126 | FLUTOLANIL                | 0,005 | 0,01 | ✓ |   | ✓ |   |
| 127 | FLUVALINATE (**)          | 0,005 | 0,01 |   | ✓ |   | ✓ |
| 128 | FOLPET                    | 0,005 | 0,01 |   | ✓ |   | ✓ |
| 129 | FONOFOS                   | 0,005 | 0,01 |   | ✓ |   | ✓ |
| 130 | FORCHLORFENURON           | 0,005 | 0,01 | ✓ |   | ✓ |   |
| 131 | FORMETANATE               | 0,005 | 0,01 | ✓ |   | ✓ |   |
| 132 | FORMOTHION (**)           | 0,005 | 0,01 |   | ✓ |   | ✓ |
| 133 | GLUFOSINATE AMONNIUM      | 0,005 | 0,01 |   | ✓ |   | ✓ |
| 134 | HALOXIFOP METHYL          | 0,005 | 0,01 | ✓ |   | ✓ |   |
| 135 | HEPTACHLOR                | 0,005 | 0,01 |   | ✓ |   | ✓ |
| 136 | HEPTACHLOR EPOXIDE        | 0,005 | 0,01 |   | ✓ |   | ✓ |
| 137 | HEPTENOPHOS               | 0,005 | 0,01 |   | ✓ |   | ✓ |
| 138 | HEXACHLOROBENZENE         | 0,005 | 0,01 |   | ✓ |   | ✓ |
| 139 | HEXACONAZOLE              | 0,005 | 0,01 |   | ✓ |   | ✓ |
| 140 | HEXAZINONE (**)           | 0,005 | 0,01 |   | ✓ |   | ✓ |
| 141 | HEXYTIAZOX                | 0,005 | 0,01 | ✓ |   | ✓ |   |
| 142 | IMAZALIL                  | 0,005 | 0,01 | ✓ |   | ✓ |   |
| 143 | IMIDACLOPRID              | 0,005 | 0,01 | ✓ |   | ✓ |   |
| 144 | INDOXACARB                | 0,005 | 0,01 | ✓ |   | ✓ |   |
| 145 | IPRODIONE                 | 0,005 | 0,01 |   | ✓ |   | ✓ |
| 146 | ISOFPENPHOS               | 0,005 | 0,01 |   | ✓ |   | ✓ |
| 147 | KRESOXIM METHYL           | 0,005 | 0,01 |   | ✓ |   | ✓ |
| 148 | LENACIL                   | 0,005 | 0,01 |   | ✓ |   | ✓ |
| 149 | LINDANE                   | 0,005 | 0,01 |   | ✓ |   | ✓ |
| 150 | LINURON                   | 0,005 | 0,01 | ✓ |   | ✓ |   |
| 151 | LUFENURON                 | 0,005 | 0,01 | ✓ |   | ✓ |   |
| 152 | MALATHION                 | 0,005 | 0,01 |   | ✓ |   | ✓ |

|     |                   |       |      |   |   |   |   |
|-----|-------------------|-------|------|---|---|---|---|
| 153 | MANDIPROPAMID     | 0,005 | 0,01 | ✓ |   | ✓ |   |
| 154 | METALAXYL         | 0,005 | 0,01 |   | ✓ |   | ✓ |
| 155 | METAMITRON        | 0,005 | 0,01 | ✓ |   | ✓ |   |
| 156 | METAFLUMIZOLE     | 0,005 | 0,01 | ✓ |   | ✓ |   |
| 157 | METHAMIDOPHOS     | 0,005 | 0,01 | ✓ |   | ✓ |   |
| 158 | METHIDATHION      | 0,005 | 0,01 |   | ✓ |   | ✓ |
| 159 | METHIOCARB        | 0,005 | 0,01 | ✓ |   | ✓ |   |
| 160 | METHOXYCHLOR      | 0,005 | 0,01 |   | ✓ |   | ✓ |
| 161 | METHOXYFENOZIDE   | 0,005 | 0,01 |   | ✓ |   | ✓ |
| 162 | METOLACHLOR       | 0,005 | 0,01 | ✓ |   | ✓ |   |
| 163 | METOMYL           | 0,005 | 0,01 | ✓ |   | ✓ |   |
| 164 | METRAFENONA       | 0,005 | 0,01 | ✓ |   | ✓ |   |
| 165 | METRIBUZIN        | 0,005 | 0,01 | ✓ |   | ✓ |   |
| 166 | MEVINPHOS         | 0,005 | 0,01 |   | ✓ |   | ✓ |
| 167 | MIREX             | 0,005 | 0,01 |   | ✓ |   | ✓ |
| 168 | MONOCROTOPHOS     | 0,005 | 0,01 | ✓ |   | ✓ |   |
| 169 | MYCLOBUTANIL      | 0,005 | 0,01 |   | ✓ |   | ✓ |
| 170 | NAPROPAMIDE       | 0,005 | 0,01 |   | ✓ |   | ✓ |
| 171 | NOVALURON         | 0,005 | 0,01 | ✓ |   | ✓ |   |
| 172 | NUARIMOL          | 0,005 | 0,01 |   | ✓ |   | ✓ |
| 173 | OMETHOATE         | 0,005 | 0,01 | ✓ |   | ✓ |   |
| 174 | OXADIAZON         | 0,005 | 0,01 |   | ✓ |   | ✓ |
| 175 | OXAMYL            | 0,005 | 0,01 | ✓ |   | ✓ |   |
| 176 | OXYFLUORFEN       | 0,005 | 0,01 |   | ✓ |   | ✓ |
| 177 | PACLOBUTRAZOL     | 0,005 | 0,01 |   | ✓ |   | ✓ |
| 178 | PARATHION ETHYL   | 0,005 | 0,01 |   | ✓ |   | ✓ |
| 179 | PARATHION METHYL  | 0,005 | 0,01 |   | ✓ |   | ✓ |
| 180 | PENCONAZOLE       | 0,005 | 0,01 | ✓ |   | ✓ | ✓ |
| 181 | PENDIMETHALIN     | 0,005 | 0,01 |   | ✓ |   | ✓ |
| 182 | PERMETHRIN        | 0,005 | 0,01 |   | ✓ |   | ✓ |
| 183 | PHORATE           | 0,005 | 0,01 |   | ✓ |   | ✓ |
| 184 | PHOSALONE         | 0,005 | 0,01 |   | ✓ |   | ✓ |
| 185 | PHOSMET           | 0,005 | 0,01 | ✓ |   | ✓ | ✓ |
| 186 | PHOSPHAMIDON      | 0,005 | 0,01 |   | ✓ |   | ✓ |
| 187 | PIRAZOPHOS        | 0,005 | 0,01 |   | ✓ |   | ✓ |
| 188 | PIRIMETHANIL      | 0,005 | 0,01 | ✓ |   | ✓ | ✓ |
| 189 | PIRIMICARB        | 0,005 | 0,01 |   | ✓ |   | ✓ |
| 190 | PIRIMIPHOS ETHYL  | 0,005 | 0,01 |   | ✓ |   | ✓ |
| 191 | PIRIMIPHOS METHYL | 0,005 | 0,01 |   | ✓ |   | ✓ |
| 192 | PROCHLORAZ        | 0,005 | 0,01 | ✓ |   | ✓ | ✓ |
| 193 | PROCYMIDONE       | 0,005 | 0,01 |   | ✓ |   | ✓ |
| 194 | PROFENOFOS        | 0,005 | 0,01 |   | ✓ |   | ✓ |
| 195 | PROPAMOCARB       | 0,005 | 0,01 | ✓ |   | ✓ | ✓ |
| 196 | PROPARGITE        | 0,005 | 0,01 |   | ✓ |   | ✓ |
| 197 | PROPICONAZOLE     | 0,005 | 0,01 |   | ✓ |   | ✓ |
| 198 | PROPOXUR          | 0,005 | 0,01 | ✓ |   | ✓ |   |
| 199 | PROPYZAMIDE       | 0,005 | 0,01 | ✓ |   | ✓ |   |
| 200 | PROTIOCONAZOLE    | 0,005 | 0,01 | ✓ |   | ✓ |   |
| 201 | PYMETROZIN        | 0,005 | 0,01 | ✓ |   | ✓ |   |
| 202 | PYRACLOSTROBIN    | 0,005 | 0,01 | ✓ |   | ✓ |   |
| 203 | PYRIDABEN         | 0,005 | 0,01 |   | ✓ |   | ✓ |
| 204 | PYRIPROXYFEN      | 0,005 | 0,01 |   | ✓ |   | ✓ |
| 205 | QUINALPHOS        | 0,005 | 0,01 |   | ✓ |   | ✓ |
| 206 | QUINOMETHIONATE   | 0,005 | 0,01 |   | ✓ |   | ✓ |

|     |                             |       |      |   |   |   |   |
|-----|-----------------------------|-------|------|---|---|---|---|
| 207 | QUINOXIFENO                 | 0,005 | 0,01 |   | ✓ |   | ✓ |
| 208 | QUINTOZENE                  | 0,005 | 0,01 |   | ✓ |   | ✓ |
| 209 | ROTENONE                    | 0,005 | 0,01 |   | ✓ |   | ✓ |
| 210 | SIMAZINE                    | 0,005 | 0,01 |   | ✓ |   | ✓ |
| 211 | SPINETORAM                  | 0,005 | 0,01 | ✓ |   | ✓ |   |
| 212 | SPINOSAD                    | 0,005 | 0,01 | ✓ |   | ✓ |   |
| 213 | SPIRODICLOFEN               | 0,005 | 0,01 | ✓ |   | ✓ |   |
| 214 | SPIROTETRAMAT               | 0,005 | 0,01 | ✓ |   | ✓ |   |
| 215 | SULFUR (S8)                 | 0,005 | 0,01 |   | ✓ |   | ✓ |
| 216 | TEBUCONAZOLE                | 0,005 | 0,01 | ✓ | ✓ |   | ✓ |
| 217 | TEBUFENOZIDE                | 0,005 | 0,01 | ✓ |   | ✓ |   |
| 218 | TEFLUTHRIN                  | 0,005 | 0,01 | ✓ |   | ✓ |   |
| 219 | TERBACIL                    | 0,005 | 0,01 |   | ✓ |   | ✓ |
| 220 | TETRACONAZOLE               | 0,005 | 0,01 |   | ✓ |   | ✓ |
| 221 | TETRADIFON                  | 0,005 | 0,01 |   | ✓ |   | ✓ |
| 222 | THIABENDAZOLE               | 0,005 | 0,01 | ✓ |   | ✓ |   |
| 223 | THIACLOPRID                 | 0,005 | 0,01 | ✓ |   | ✓ |   |
| 224 | THIAMETHOXAM                | 0,005 | 0,01 | ✓ |   | ✓ |   |
| 225 | THIDIAZURON (**)            | 0,005 | 0,01 | ✓ |   | ✓ |   |
| 226 | THIOCYCLAM HYDROGEN OXALATE | 0,005 | 0,01 | ✓ |   | ✓ |   |
| 227 | THIOPHANATE METHYL          | 0,005 | 0,01 | ✓ |   | ✓ |   |
| 228 | TOLCLOFOS METHYL            | 0,005 | 0,01 | ✓ |   | ✓ |   |
| 229 | TOLYLFLUANID                | 0,005 | 0,01 |   | ✓ |   | ✓ |
| 230 | TOXAPHENE (**)              | 0,005 | 0,01 |   | ✓ |   | ✓ |
| 231 | TRIADIMEFON                 | 0,005 | 0,01 | ✓ |   | ✓ |   |
| 232 | TRIADIMENOL                 | 0,005 | 0,01 | ✓ |   | ✓ |   |
| 233 | TRIAZOPHOS                  | 0,005 | 0,01 | ✓ |   | ✓ |   |
| 234 | TRICHLORFON (**)            | 0,005 | 0,01 |   | ✓ |   | ✓ |
| 235 | TRIFLOXYSTROBIN             | 0,005 | 0,01 |   | ✓ |   | ✓ |
| 236 | TRIFLUMIZOLE                | 0,005 | 0,01 | ✓ |   | ✓ |   |
| 237 | TRIFLUMORON                 | 0,005 | 0,01 | ✓ |   | ✓ |   |
| 238 | TRIFLURALIN                 | 0,005 | 0,01 |   | ✓ |   | ✓ |
| 239 | TRIFORINE                   | 0,005 | 0,01 | ✓ |   | ✓ |   |
| 240 | UNICONAZOLE                 | 0,005 | 0,01 | ✓ |   | ✓ |   |
| 241 | VAMIDOTHION                 | 0,005 | 0,01 | ✓ |   | ✓ |   |
| 242 | VINCLOZOLIN                 | 0,005 | 0,01 |   | ✓ |   | ✓ |
